# Supplementary material for: Intake of micronutrients and fatty acids of vegetarian, vegan, and omnivorous children (1–3 years) in Germany (VeChi Diet Study)
Source: Springer Nature journal article supplement (doi:10.1007/s00394-021-02753-3), 2021-12-02
Supplement: MOESM1 [file 19923930]

## **Intake of Micronutrients and Fatty Acids of Vegetarian, Vegan, and Omnivorous Children (1-3 Years) in Germany (VeChi Diet Study)**

Stine Weder<sup>1,2</sup>, Markus Keller<sup>1</sup>, Morwenna Fischer<sup>3</sup>, Katja Becker<sup>2</sup>, Ute Alexy<sup>4</sup>

<sup>1</sup>Research Institute for Plant-Based Nutrition, 35444 Biebertal, Germany, ORCID: S. Weder 0000-0001-5360-1940, M. Keller 0000-0001-5789-6280;

<sup>2</sup>Biochemistry and Molecular Biology, Interdisciplinary Research Center, Justus Liebig University Giessen, 35392 Giessen, Germany, ORCID: 0000-0003-4673-3675;

<sup>3</sup>45525 Hattingen, Germany;

<sup>4</sup>Corresponding author: IEL-Nutritional Epidemiology, DONALD Study, University of Bonn, Heinstück 11, 44225 Dortmund, Germany, E-Mail: alexy@uni-bonn.de, Tel.: +49-231-79221016, ORCID: 0000-0002-1488-5175.

### **Summary**

This supplementary information includes a flow chart of the recruitment of the VeChi Diet Study (Fig. S1). Fig. S2 shows the intake of vitamins and minerals as percentages of the harmonised Average Requirement (%h-AR). Table S1 presents the mean intake of vitamins, minerals, and long chain n-3 fatty acids obtained from food and dietary supplements.

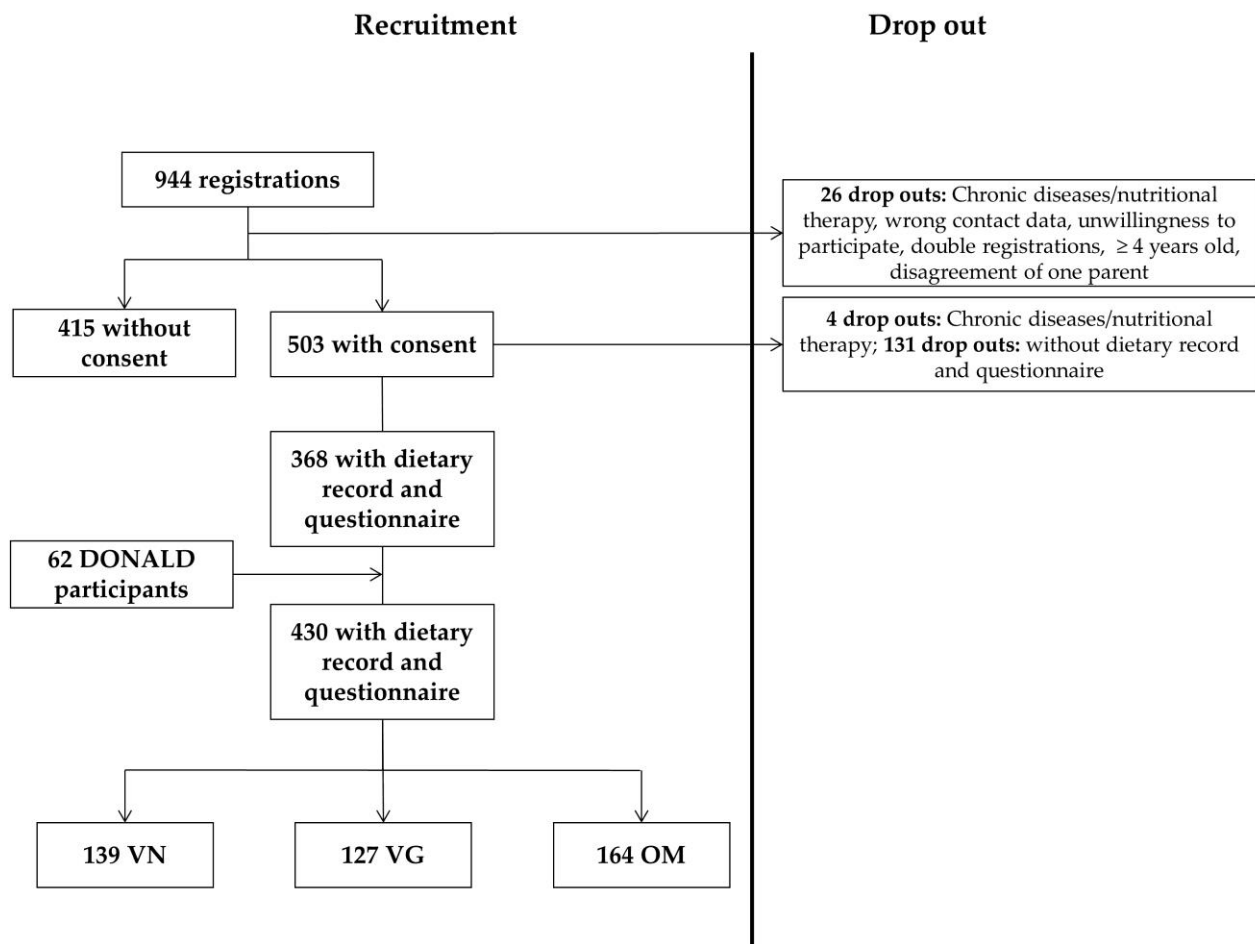

**Fig. S1** Flow chart showing the recruitment of vegetarian (VG), vegan (VN), and omnivorous (OM) children in the VeChi Diet Study

**Vitamin A intake (%h-AR)**

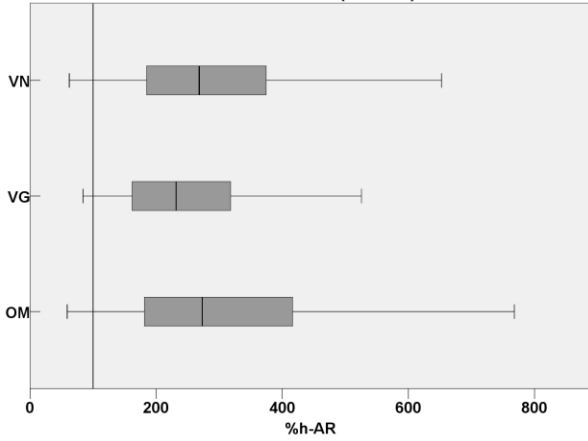

**Vitamin E intake (%h-AR)**

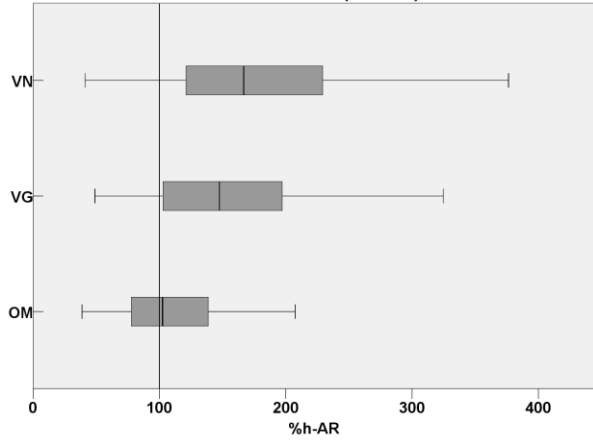

**Vitamin B1 intake (%h-AR)**

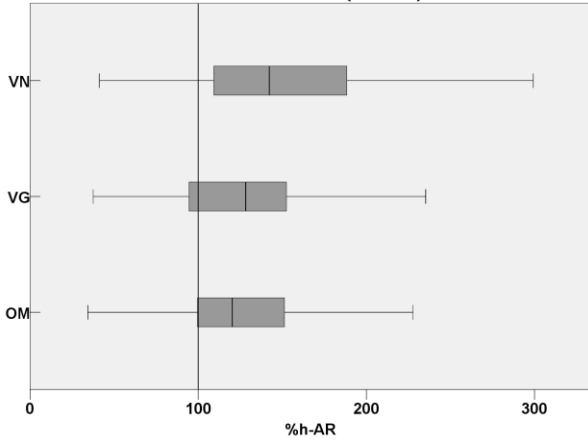

**Vitamin B2 intake (%h-AR)**

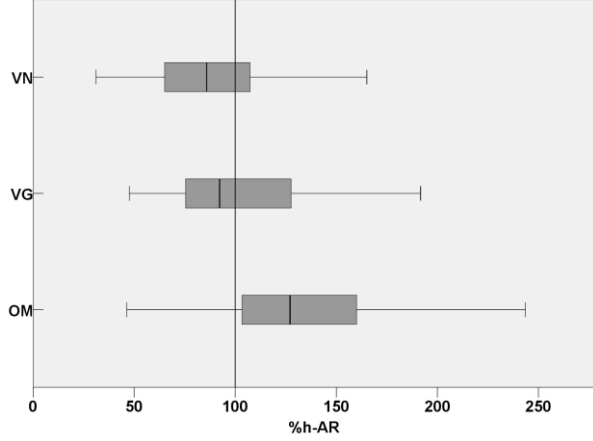

**Vitamin B6 intake (%h-AR)**

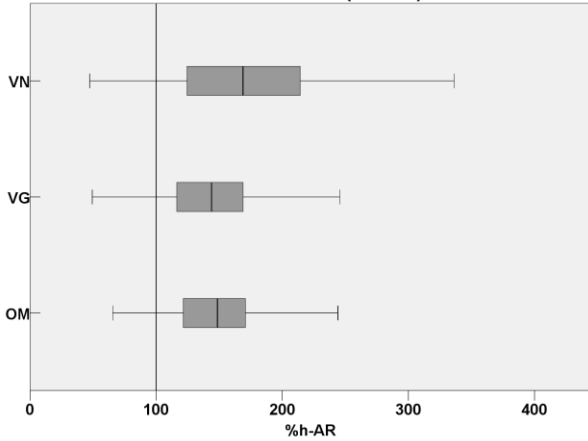

**Folate intake (%h-AR)**

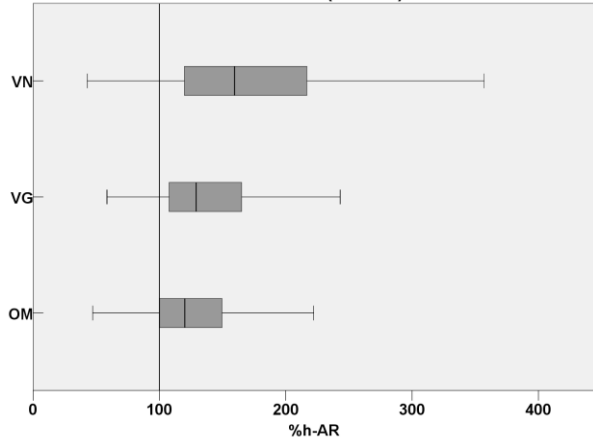

**Vitamin C intake (%h-AR)**

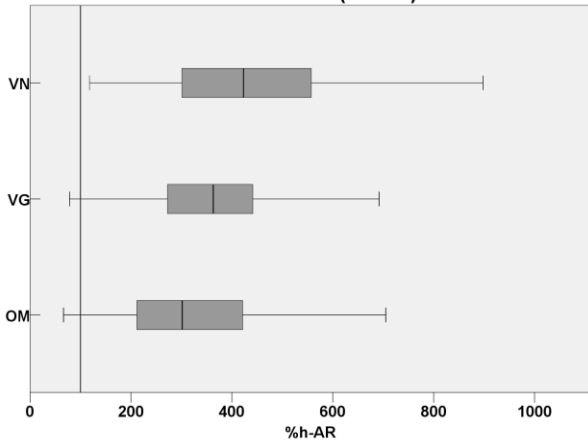

**Vitamin B12 intake (%h-AR)**

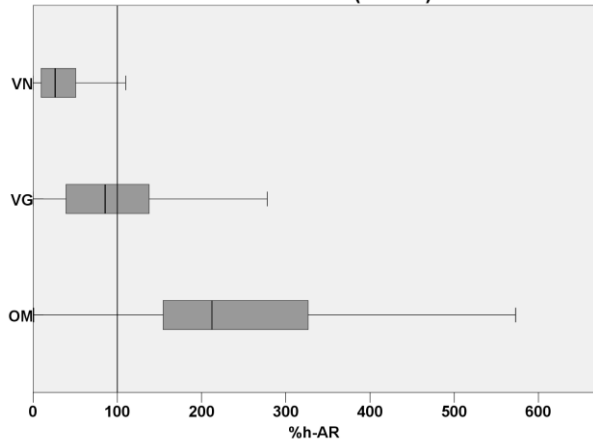

**Vitamin D intake (%h-AR)**

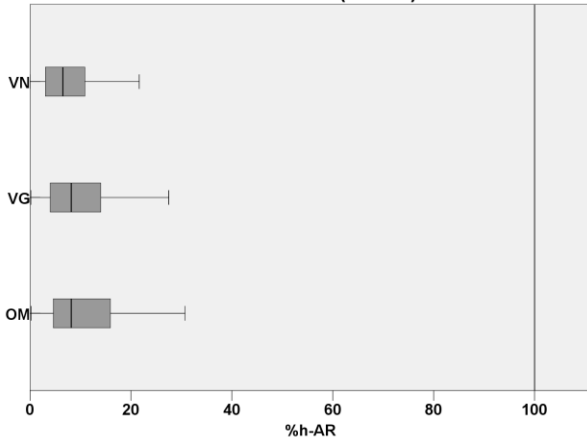

**Calcium intake (%h-AR)**

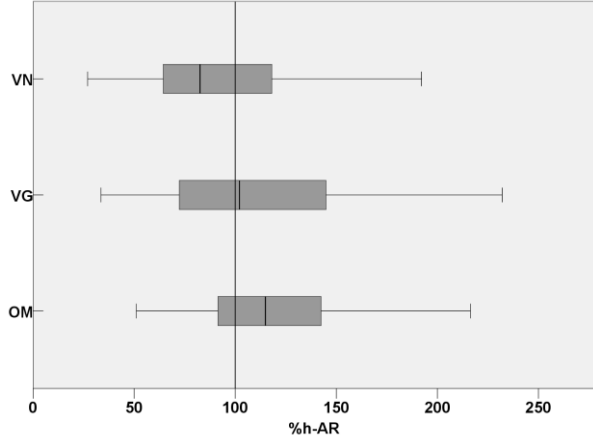

**Magnesium intake (%h-AR)**

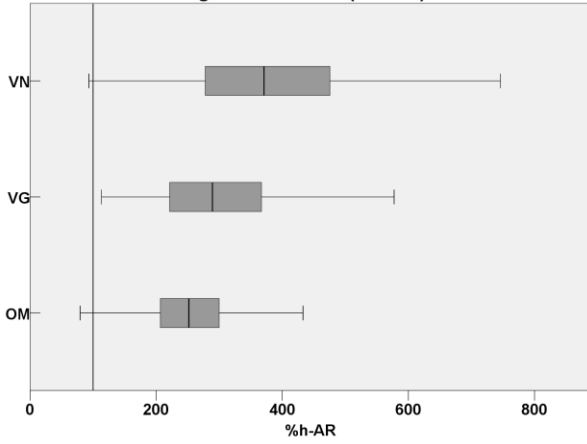

**Iron intake (%h-AR, moderate absorption)**

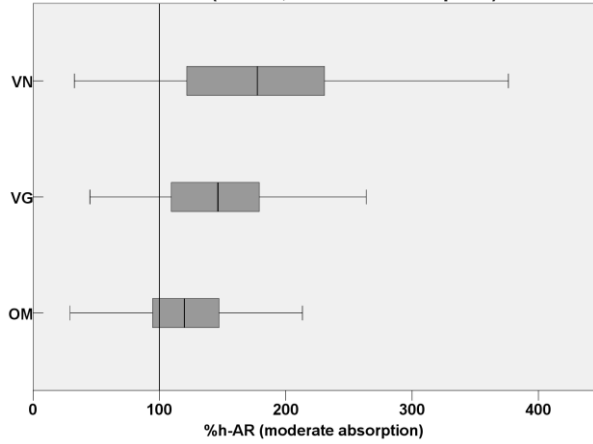

**Iron intake (%h-AR, low absorption)**

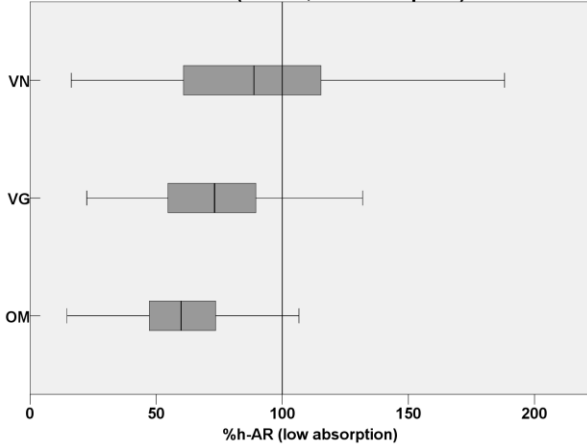

**Zinc intake (%h-AR)**

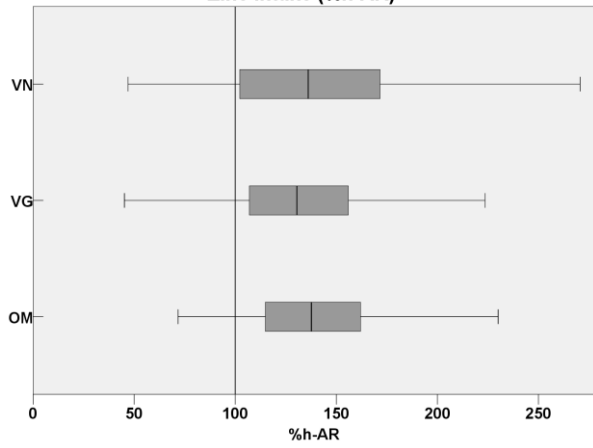

**Iodine intake (%h-AR)**

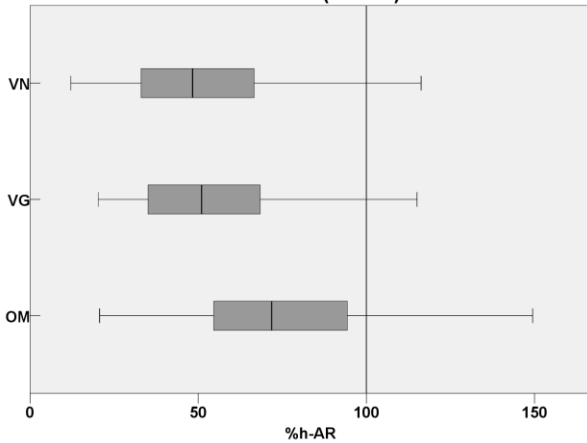

**Fig. S2** Intake of vitamins and minerals as percentages of the harmonised Average Requirement (h-AR) (1) by diet group in 1–3-year-old children in the VeChi Diet Study. %h-AR, percentages of the harmonised Average Requirement; VN, vegan; VG, vegetarian; OM, omnivorous. Median [—], interquartile range [box; 25<sup>th</sup> and 75<sup>th</sup> percentiles], minimum and maximum value

**Table S1** Mean intake of vitamins, minerals, and long chain n-3 fatty acids obtained from food and dietary supplements of vegan (VN), vegetarian (VG), and omnivorous (OM) children in the VeChi Diet Study

|                                | VN (n = 139) |             | VG (n = 127) |             | OM (n = 164) |             | h-AR (1)                                         |
|--------------------------------|--------------|-------------|--------------|-------------|--------------|-------------|--------------------------------------------------|
|                                | Food         | Supplements | Food         | Supplements | Food         | Supplements |                                                  |
| Vitamin A (retinol eq) (µg/d)  | 623 ± 361    | 16 ± 87     | 544 ± 324    | 3 ± 23      | 692 ± 517    | 3 ± 34      | 205                                              |
| Vitamin E (mg/d)               | 9.2 ± 4.3    | 0.7 ± 3.2   | 7.8 ± 3.4    | 0.5 ± 3.8   | 5.7 ± 2.6    | 0.5 ± 5.4   | 5.0                                              |
| Vitamin D (µg/d)               | 1 ± 1        | 19 ± 45     | 1 ± 1        | 6 ± 8       | 1 ± 1        | 5 ± 8       | 10                                               |
| Vitamin K (µg/d)               | 98 ± 74      | 4 ± 15      | 71 ± 44      | 0 ± 3       | 57 ± 43      | 1 ± 7       | -                                                |
| Vitamin B <sub>1</sub> (µg/d)  | 605 ± 252    | 56 ± 253    | 512 ± 189    | 54 ± 321    | 513 ± 158    | 37 ± 405    | 400                                              |
| Vitamin B <sub>2</sub> (µg/d)  | 469 ± 224    | 145 ± 504   | 525 ± 222    | 52 ± 266    | 678 ± 237    | 35 ± 284    | 500                                              |
| Vitamin B <sub>6</sub> (mg/d)  | 0.9 ± 0.4    | 0.2 ± 0.6   | 0.7 ± 0.3    | 0.06 ± 0.4  | 0.8 ± 0.2    | 0.06 ± 0.5  | 0.5                                              |
| Folate (µg/d)                  | 160 ± 79     | 23 ± 69     | 125 ± 42     | 10 ± 73     | 116 ± 40     | 8 ± 90      | 90                                               |
| Vitamin C (mg/d)               | 68 ± 31      | 7 ± 31      | 57 ± 24      | 4 ± 29      | 50 ± 24      | 4 ± 40      | 15                                               |
| Vitamin B <sub>12</sub> (µg/d) | 0.3 ± 0.3    | 208 ± 305   | 0.8 ± 0.7    | 68 ± 177    | 1.8 ± 1.1    | 20 ± 147    | 0.7                                              |
| Potassium (mg/d)               | 1842 ± 658   | 0 ± 2       | 1581 ± 486   | 0 ± 2       | 1591 ± 433   | 1 ± 4       | -                                                |
| Calcium (mg/d) #               | 368 ± 167    | 6 ± 34      | 428 ± 184    | 1 ± 11      | 471 ± 154    | 1 ± 10      | 390                                              |
| Magnesium (mg/d)               | 250 ± 103    | 4 ± 27      | 197 ± 77     | 1 ± 6       | 171 ± 50     | 1 ± 8       | 65                                               |
| Iron (mg/d)                    | 8.9 ± 3.8    | 1.7 ± 7.0   | 7.4 ± 2.9    | 0.1 ± 0.5   | 6.2 ± 2.2    | 0.2 ± 1.4   | moderate absorption: 5.0<br>low absorption: 10.0 |
| Zinc (mg/d)                    | 5.1 ± 1.9    | 0.3 ± 1.2   | 4.8 ± 1.6    | 0.1 ± 0.5   | 5.1 ± 1.3    | 0.1 ± 0.7   | 3.6                                              |
| Iodine (µg/d)                  | 35 ± 25      | 9 ± 26      | 44 ± 90      | 1 ± 8       | 50 ± 23      | 2 ± 8       | 65                                               |
| 20:5n-3 (EPA, mg/d)            | 5.6 ± 6.7    | 10.2 ± 43.7 | 3.4 ± 4.5    | 8.2 ± 42.0  | 35.6 ± 52.6  | 0 ± 0       | -                                                |
| 22:6n-3 (DHA, mg/d)            | 27.5 ± 31.0  | 20.7 ± 79.7 | 21.3 ± 17.5  | 16.2 ± 73.0 | 65.5 ± 80.8  | 0 ± 0       | -                                                |

VN, vegan; VG, vegetarian; OM, omnivorous; h-AR, harmonized Average Requirement; eq, equivalents.

Values are presented mean ± SD.

# without outliers (n = 4)

## **Literature Cited**

1. Allen LH, Carriquiry AL, Murphy SP. Perspective: Proposed Harmonized Nutrient Reference Values for Populations. *Adv Nutr* 2020; 11(3):469–83.
